# Supplementary material
Source: MDPI journal article supplement (https://www.mdpi.com/2073-4441/12/1/48)
Supplement: s1 [file s1]

Article

# Enrichment of Denitrifying Bacterial Community using Nitrite as an Electron Acceptor for Nitrogen Removal from Wastewater

Renda Yao, Quan Yuan and Kaijun Wang\*

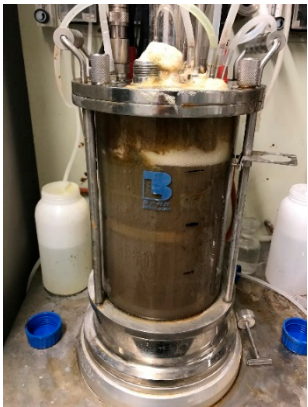

Figure S1. The conditions of the SBR at the end of the enrichment period.

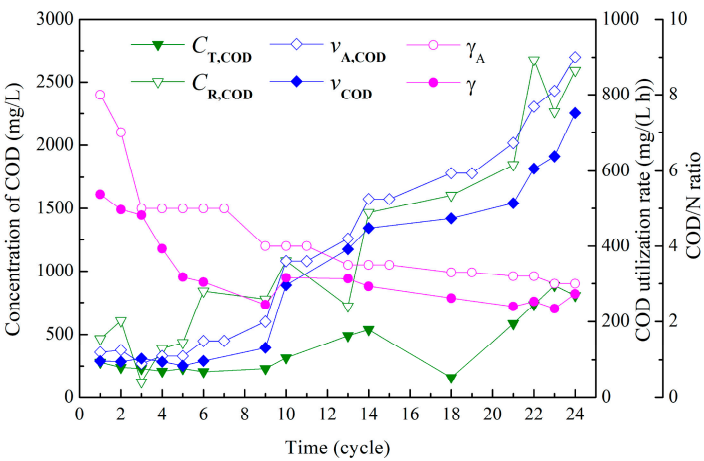

Figure S2. The COD/N ratio during the enrichment period of the denitrifying bacterial community using nitrite as an electron acceptor.

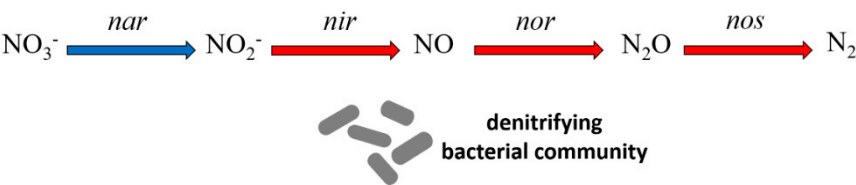

Figure S3. Denitrification pathways and key enzymes.
